# Supplementary material
Source: Springer Nature journal article supplement (https://www.springermedizin.de/resource/supplementary/13075_2009_2847_MOESM4_ESM.pdf/9693024)

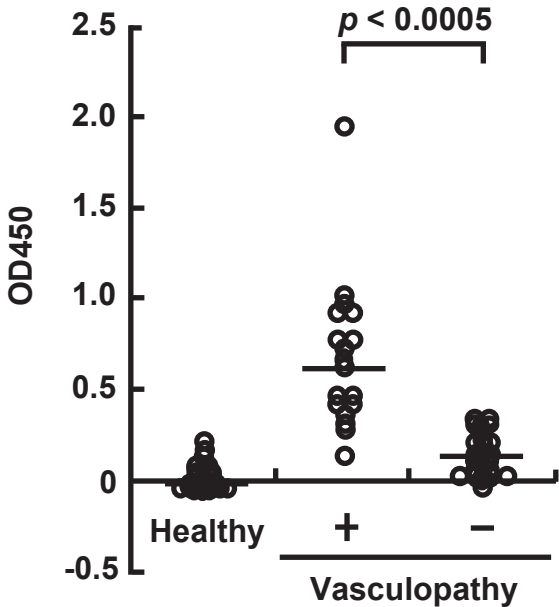

Supplement: MOESM4 [file 9693024]
